# Supplementary material for: High MUC2 Expression in Ovarian Cancer Is Inversely Associated with the M1/M2 Ratio of Tumor-Associated Macrophages and Patient Survival Time
Source: PubMed Central journal article supplement (PMC3855613; doi:10.1371/journal.pone.0079769), 2013-12-06
Supplement: pone.0079769.s003.pdf [file pone.0079769.s003.pdf]

### Supplementary Table

**Table S1. A comparison of selected demographic and pathological characteristics of the patients with benign and malignant ovarian tumors \***

| Characteristics                  | Benign ovarian tumor<br>(n=33) | Malignant ovarian tumor<br>(n=102) | p value † |
|----------------------------------|--------------------------------|------------------------------------|-----------|
| <b>Demographics:</b>             |                                |                                    |           |
| Age (years)                      | 45.7±11.3                      | 59.3±6.2                           | <0.001 §  |
| Gravidity                        | 3.1±1.8                        | 4.1±1.1                            | <0.001 §  |
| Parity                           | 0.8±0.7                        | 1.1±0.4                            | 0.005 §   |
| BMI                              | 23.0±1.5                       | 23.2±2.4                           | 0.803     |
| Oral contraceptive use >1/2 year | 3 (9.1)                        | 9 (8.8)                            | 0.963     |
| Smoking >1/2 year                | 8 (24.2)                       | 17 (16.7)                          | 0.330     |
| Alcohol abuse >1/2 year          | 2 (6.1)                        | 2 (2.0)                            | 0.227     |
| <b>Pathology:</b>                |                                |                                    |           |
| Histotype                        |                                |                                    | 0.032 §   |
| Serous                           | 31 (93.9)                      | 67 (65.7)                          |           |
| Mucinous                         | 2 (6.1)                        | 17 (16.7)                          |           |
| Endometrioid                     | 0                              | 9 (8.8)                            |           |
| Clear cell                       | 0                              | 7 (6.9)                            |           |
| Undifferentiated                 | 0                              | 2 (2.0)                            |           |
| MUC2 immunostaining              |                                |                                    | 0.026 §   |
| -                                | 21 (63.6)                      | 54 (52.9)                          |           |
| +                                | 12 (36.4)                      | 25 (24.5)                          |           |
| ++                               | 0 (0)                          | 15 (14.7)                          |           |
| +++                              | 0 (0)                          | 8 (7.8)                            |           |

\* Data are presented as the mean values ±standard deviation or the number (percentage)

† The two-tailed Student's t-test or  $\chi^2$  test was used, as appropriate.

§ Statistical significance.
